# Supplementary material
Source: publisher site journal article supplement (https://www.spandidos-publications.com/5190/downloadSupplementary)

Figure S1. Sequencing of *Porphyromonas gingivalis* 16S rDNA nested PCR products from NPC formalin-fixed paraffin-embedded tissues. (A) Partial of sequencing map from NPC-18 sequenced in forward direction with 404-F primers. (B) Nested PCR product sequences for each NPC subjects. NPC, nasopharyngeal carcinoma.

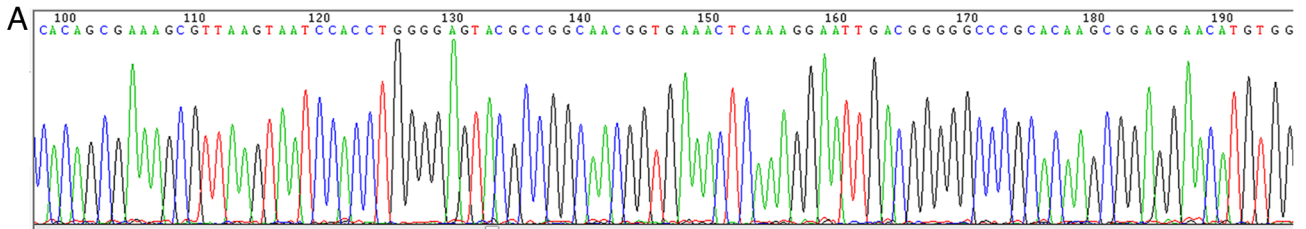

**B**

**NPC-14\_404 For**  
AGATACCCCTGGTAGTCCACGCGAGTAAACGATGATTACTAGGAGTTTGC GATA  
TACCGTCAAGCTTCCACAGCGAAAGCGTAAAGTAATCCACCTGGGGAGTAC  
GCCGGCAACGGTGAAGAACTCAAAGGAATGACGGGGCCCGCACAAGCGG  
AGGAACATGTGGTTAATTGATGATACGCGAGGAACTTACCCGGGATTG  
AAATGTAGATGACTGATGCGTGAACCCGCTTCCCTTCGGGGCTTCTATGTA  
GGTGCTGATGTTGTCAGTCTGTCGCGGTAGGTTGTCGCTTAAGTGC  
CATAACGAGCGCAACCCACATCGTA

**NPC-14\_404 Rev**  
CGGCACGAGCTGACGACAACCATGCGACACCTACATAGAAAGCCCGAAGG  
GAAGACGGTTTTCACCATCATGCTATCTACATTTCAATCCCGGGTAAGGTTCC  
TCGCGTATCATCGAATTAACACACATGTTCTCCGCTTGTGGGGCCCGT  
CAATTCCTTTGAGTTTCAACGTTGCGCGCTACTCCCAAGGTGATTAATTA  
ACGCTTTGCTGTTGAAAGCTTACGGTATATCCAAACTCCTAGTAATCATC  
GTTACTGGGTGACTACGAGGGTATCTAATCTGTTGATACCCACGCCTT  
CGTCTTCAAGTGTACGTCAGTCCAGTA

**NPC-18\_404 For**  
ACCCTGGTAGTCCACGCGAGTAAACGATGATTACTAGGAGTTTGC GATA  
GTC AAGCTTCCACAGCGAAAGCGTAAAGTAATCCACCTGGGGAGTAC  
GCCAAGGTTGAAGTCAAAGGAAATGACGGGGCCCGACAAGCGGAGG  
AACATGTGGTTAATTGATGATACGCGAAGAACTTACCCGGGATTGAAAT  
GTAGATGACTGATGCTGAAACCCGCTTCCCTTCGGGGCTTCTATGTA  
GCTGCTGTTGTCGTAAGTCTGTCGCGGTGAGGTTGCGGTTAAGTGC  
CATACGAGCGCAACCCACATCG

**NPC-18\_404 Rev**  
AGCCGACACCTCAGCGACGAGCTGACGACAACCATGCGACCTACATAG  
GAAGCCCGAAGGGAAGACGGTTTTCACCATCATGCTATCTACATTTCAATC  
CGGGTAAGTTCCTCGCTATCATCGAATTAACACACATGTTCTCCGCTT  
GTGGGGCCCGGTCATCTTGTGATTTCAACCTGTCGGGGTACTCC  
CAGGTTGATTAATACGCTTTGCTGTTGGAAGCTTACGGGTTATATCGAA  
ACTCTAGTAATCATGTTACTGCGGTGACTACAGGGTATCTAATCTGCT  
TTGATACCCACGCTTCTGCTTCAAGTGTGCGTCCAGTA

**NPC-23\_404 For**  
TTAGATACCCCTGGTAGTCCACGCGAGTAAACGATGATTACTAGGAGTTTGC GATA  
TAACCGTCAAGCTTCCACAGCGAAAGCGTAAAGTAATCCACCTGGGGAGT  
ACGCCGCAACGGTGAAGAACTCAAAGGAATGACGGGGCCCGCACAAGC  
GGAGGAACATGTGGTTAATTGATGATACGCGAAGAACTTACCCGGGATT  
TGAATGTAGATGACTGATGCGTGAACCCGCTTCCCTTCGGGGCTTCTAT  
GTAGGTCGCTGATGTTGTCAGTCTGTCGCGGTAGGTTGTCGCTTAAGT  
GCCATAACGAGCGCAACCCACATCGTAGT

**NPC-23\_404 Rev**  
CGGCACGAGCTGACGACAACCATGCGACACCTACATAGAAAGCCCGAAGG  
AAAACGGTTTTCACCATCATGCTATCTAATTTCAATCCCGGTAAGGTTCTC  
CGCTATCATCGAATTAACACACATGTTCTCCGCTTGTGGGGCCCGGCT  
AATTCCTTTGAGTTTCAACGTTGCGCGCTACTCCCAAGGTGATTAATTA  
CGCTTTCGCTGTTGAAAGCTTACGGTATATCGCAACTCTAGTAATCATC  
TTTACTGCTGGACTACAGGGTATCTAATCTGTTTGTGATAACCCACGCTT  
GTGCTTCAAGTGTACGTCAGTCCAGTATG

**NPC-25\_404 Rev**  
CCTCACGGACGAGCTGACGACAACCATGCGACAGCACTACATAGAAAGCCCG  
GAAGGGAAAGACGGTTTTCACCATCATGCTATCTAATTTCAATCCCGGGTAA  
GGTTCTCGCGTATCATCGAATTAACACACATGTTCTCCGCTTGTGGGGC  
CCCGTCAATTCCTTTGAGTTTTCACCGTTGCGCGGTACTCCCAAGGTGAT  
TACTTAAACGCTTTCGCTGTTGGAAGCTTACGGGATATCGCAAACTCTAGTA  
ATCATCGTTTACTGCGTGAACCTACCGAGGTATCTAATCTGTTGATACCCA  
CGCTTTCGCTTCAAGTGTGTCAGTCCAGTATG

**NPC-24\_404 For**  
AGATACCCCTGGTAGTCCACGCGAGTAAACGATGATTACTAGGAGTTTGC GATA  
TACCGTCAAGCTTCCACAGCGAAAGCGTAAAGTAATCCACCTGGGGAGTAC  
GCCGGCAACGGTGAAGAACTCAAAGGAATGACGGGGCCCGCACAAGCGG  
AGGAACATGTGGTTAATTGATGATACGCGAGGAACTTACCCGGGATTG  
AAATGTAGATGACTGATGCGTGAACCCGCTTCCCTTCGGGGCTTCTATGTA  
GGTGCTGATGTTGTCAGTCTGTCGCGGTAGGTTGTCGCTTAAGTGC  
CATAACGAGCGCAACCCACATCGTA

**NPC-24\_404 Rev**  
CGGCACGAGCTGACGACAACCATGCGACACCTACATAGAAAGCCCGAAGG  
GAAGACGGTTTTCACCATCATGCTATCTACATTTCAATCCCGGGTAAGGTTCC  
TCGCGTATCATCGAATTAACACACATGTTCTCCGCTTGTGGGGCCCGT  
CAATTCCTTTGAGTTTCAACGTTGCGCGCTACTCCCAAGGTGATTAATTA  
ACGCTTTGCTGTTGAAAGCTTACGGTATATCCAAACTCCTAGTAATCATC  
GTTACTGGGTGACTACGAGGGTATCTAATCTGTTGATACCCACGCCTT  
CGTCTTCAAGTGTACGTCAGTCCAGTA

**NPC-31\_404 For**  
GATACCCCTGGTAGTCCACGCGAGTAAACGATGATTACTAGGAGTTTGC GATA  
GATACCCCTGGTAGTCCACGCGAGTAAACGATGATTACTAGGAGTTTGC GATA  
TACCGTCAAGCTTCCACAGCGAAAGCGTAAAGTAATCCACCTGGGGAGTAC  
GCCGGCAACGGTGAAGAACTCAAAGGAATGACGGGGCCCGCACAAGCGG  
AGGAACATGTGGTTAATTGATGATACGCGAGGAACTTACCCGGGATTG  
AAATGTAGATGACTGATGCGTGAACCCGCTTCCCTTCGGGGCTTCTATGTA  
GGTGCTGATGTTGTCAGTCTGTCGCGGTAGGTTGTCGCTTAAGTGC  
CATAACGAGCGCAACCCACATCGTAGTCCAGTA

**NPC-31\_404 Rev**  
CGGCACGAGCTGACGACAACCATGCGACACCTACATAGAAAGCCCGAAGG  
AAAACGGTTTTCACCATCATGCTATCTAATTTCAATCCCGGTAAGGTTCTC  
CGCTATCATCGAATTAACACACATGTTCTCCGCTTGTGGGGCCCGGCT  
AATTCCTTTGAGTTTCAACGTTGCGCGCTACTCCCAAGGTGATTAATTA  
CGCTTTCGCTGTTGAAAGCTTACGGTATATCGCAACTCTAGTAATCATC  
TTTACTGCTGGACTACAGGGTATCTAATCTGTTTGTGATAACCCACGCTT  
GTGCTTCAAGTGTACGTCAGTCCAGTATG

**NPC-37\_404 For**  
GATACCCCTGGTAGTCCACGCGAGTAAACGATGATTACTAGGAGTTTGC GATA  
ACCGTCAAGCTTCCACAGCGAAAGCGTAAAGTAATCCACCTGGGGAGTAC  
GCCGGCAACGGTGAAGAACTCAAAGGAATGACGGGGCCCGCACAAGCGG  
AGGAACATGTGGTTAATTGATGATACGCGAGGAACTTACCCGGGATTG  
AAATGTAGATGACTGATGCGTGAACCCGCTTCCCTTCGGGGCTTCTATGTA  
GGTGCTGATGTTGTCAGTCTGTCGCGGTAGGTTGTCGCTTAAGTGC  
CATAACGAGCGCAACCCACATCGTAGTCCAGTA

**NPC-37\_404 Rev**  
CACGGCAGAGCTGACGACAACCATGCGACACCTACATAGAAAGCCCGAAGG  
GGGAAGACGGTTTTCACCATCATGCTATCTAATTTCAATCCCGGGTAAGT  
TCCTCGGTATCATCGAATTAACACACATGTTCTCCGCTTGTGGGGCCCG  
CGTCAATTCCTTTGAGTTTCAACGTTGCGCGCTACTCCCAAGGTGATTAC  
TTAACGCTTTCGCTGTTGAAAGCTTACGGTATATCGCAAACTCTAGTAATC  
ATCGTTTACTGCGTGGACTACCGAGGTATCTAATCTGTTGATACCCACGCT  
CTTCGCTTCAAGTGTACGTCAGTCCAGTATG

**NPC-42\_404 For**  
GATACCCCTGGTAGTCCACGCGAGTAAACGATGATTACTAGGAGTTTGC GATA  
ACCGTCAAGCTTCCACAGCGAAAGCGTAAAGTAATCCACCTGGGGAGTAC  
GCCGGCAACGGTGAAGAACTCAAAGGAATGACGGGGCCCGCACAAGCGG  
AGGAACATGTGGTTAATTGATGATACGCGAGGAACTTACCCGGGATTG  
AAATGTAGATGACTGATGCGTGAACCCGCTTCCCTTCGGGGCTTCTATGTA  
GGTGCTGATGTTGTCAGTCTGTCGCGGTAGGTTGTCGCTTAAGTGC  
CATAACGAGCGCAACCCACATCGTAGTCCAGTA

**NPC-42\_404 Rev**  
ACGGCAGAGCTGACGACAACCATGCGACACCTACATAGAAAGCCCGAAGG  
GGGAAGACGGTTTTCACCATCATGCTATCTAATTTCAATCCCGGGTAAGT  
TCCTCGGTATCATCGAATTAACACACATGTTCTCCGCTTGTGGGGCCCG  
TCAATTCCTTTGAGTTTCAACGTTGCGCGCTACTCCCAAGGTGATTACT  
AACGCTTTCGCTGTTGAAAGCTTACGGTATATCGCAAACTCTAGTAATCAT  
CGTCTTACTGCTGGACTACAGGGTATCTAATCTGTTTGTGATAACCCACGCT  
TCGTTCTTCAAGTGTACGTCAGTCCAGTATG

Figure S2. Single-step PCR products detecting *Porphyromonas gingivalis* from formalin-fixed paraffin-embedded tissues for all subjects run on agarose gel with DL 2000 as DNA marker, including negative and positive controls. (A) Products examined from NPC-1 to NPC-12, positive and negative. (B) Products examined from NPC-13 to NPC-22. (C) Products examined from NPC-23 to NPC-45. NPC, nasopharyngeal carcinoma.

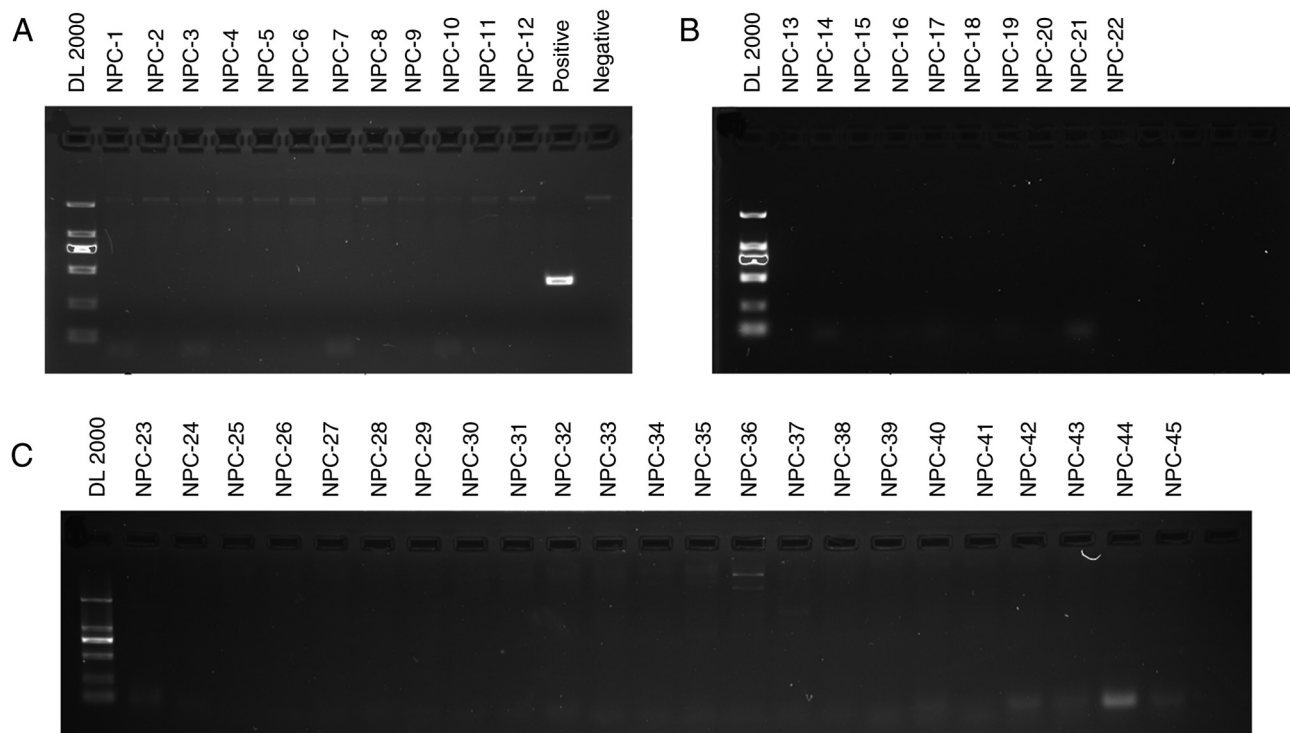

Figure S3. Kaplan-Meier curve showing the 5-year overall survival for *P. gingivalis* positive and *P. gingivalis* negative patients with nasopharyngeal carcinoma. Pg, *Porphyromonas gingivalis*; +, positive; -, negative.

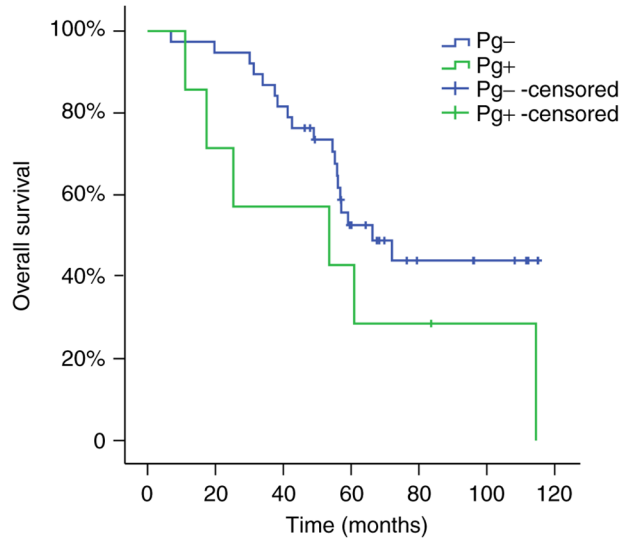

Supplement: Supplementary file 1 [file downloadSupplementary]
